# Supplementary material for: Environmental Dissemination of Selected Antibiotics from Hospital Wastewater to the Aquatic Environment
Source: MDPI journal article supplement (doi:10.3390/antibiotics9070431), 2020-07-21
Supplement: s1 [file s1]

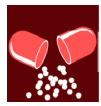

# Supplementary information for Ekwanzala et al. 2020\_Antibiotics Quantification

Running title: Environmental dissemination of antibiotics

**Mutshiene Deogratias Ekwanzala <sup>1</sup>, Raisibe Florence Lehutso <sup>2</sup>, Teddy Kabeya Kasongo <sup>1</sup>, John Barr Dewar <sup>3</sup> and Maggy Ndombo Benteke Momba <sup>1,\*</sup>**

<sup>1</sup> Department of Environmental, Water and Earth Sciences, Tshwane University of Technology, Arcadia Campus, Private BagX680, Pretoria 0001, South Africa; ekwanzala.md@gmail.com (M.D.E.); teddykasonga@yahoo.fr (T.K.K.)

<sup>2</sup> Water Centre, Council for Scientific and Industrial Research, Pretoria, South Africa

<sup>3</sup> Department of Life and Consumer Sciences, University of South Africa, Florida Campus, Johannesburg 1709, South Africa; dewarj@unisa.ac.za

\* Correspondence: mombamnb@tut.ac.za; Tel.: +27123826365

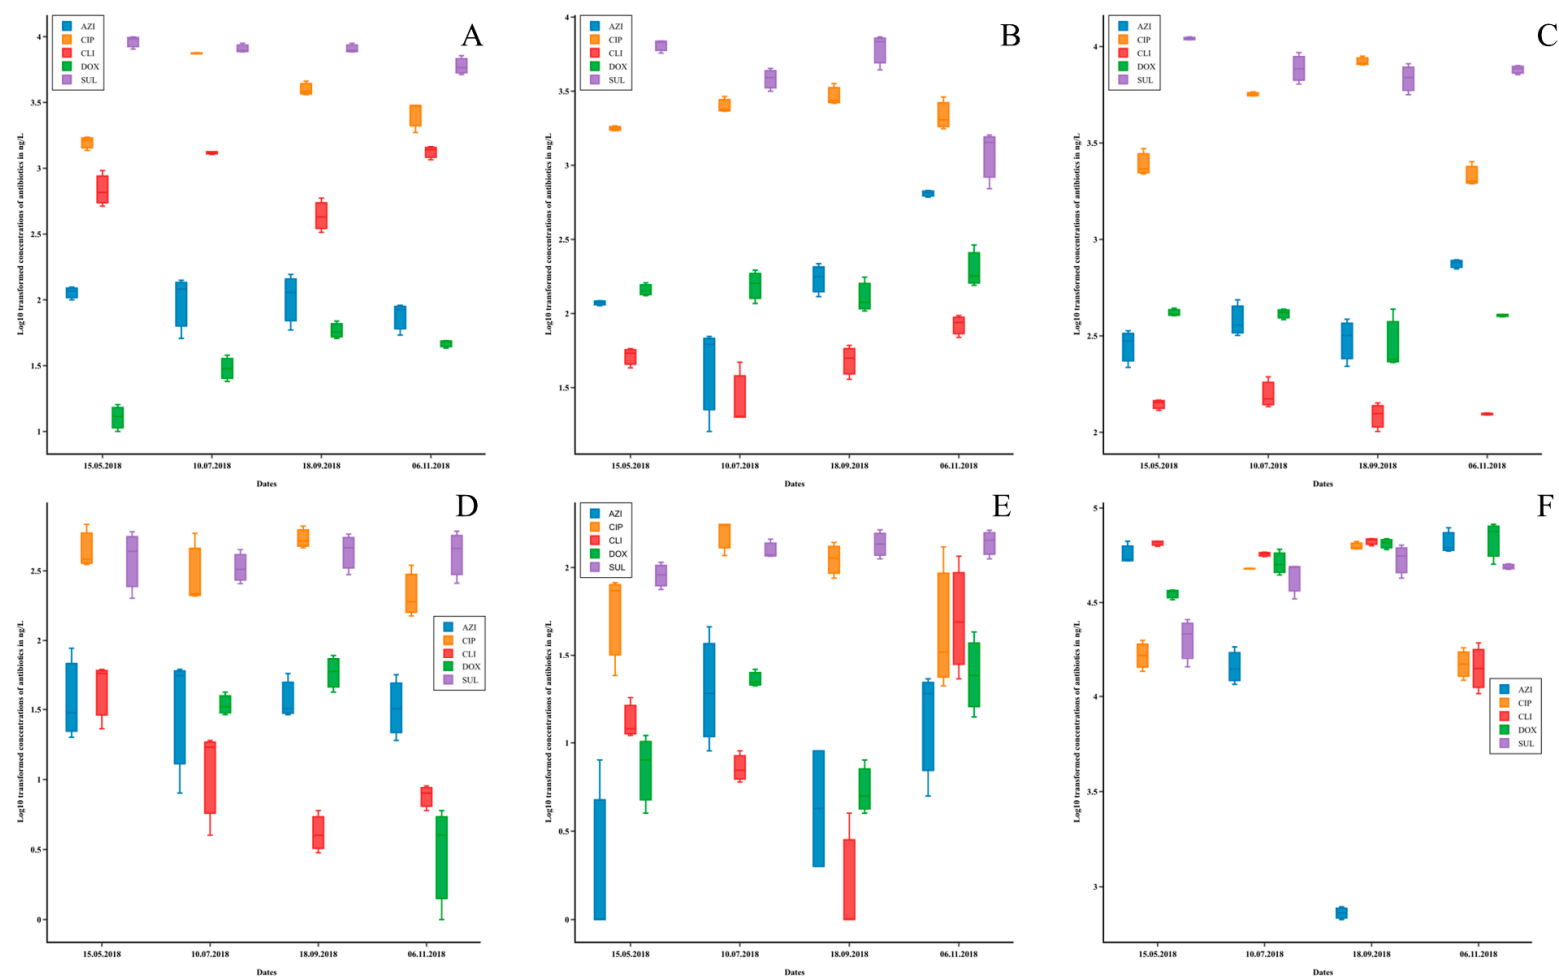

**Figure 1.** Two-way ANOVA visualisation of data interactions between assessed antibiotics (AZM, CIP, CDM, DXC and SMZ) and sampled dates on HW (A), IW (B), AS (C), EW (D), RW (E) and RS (F).

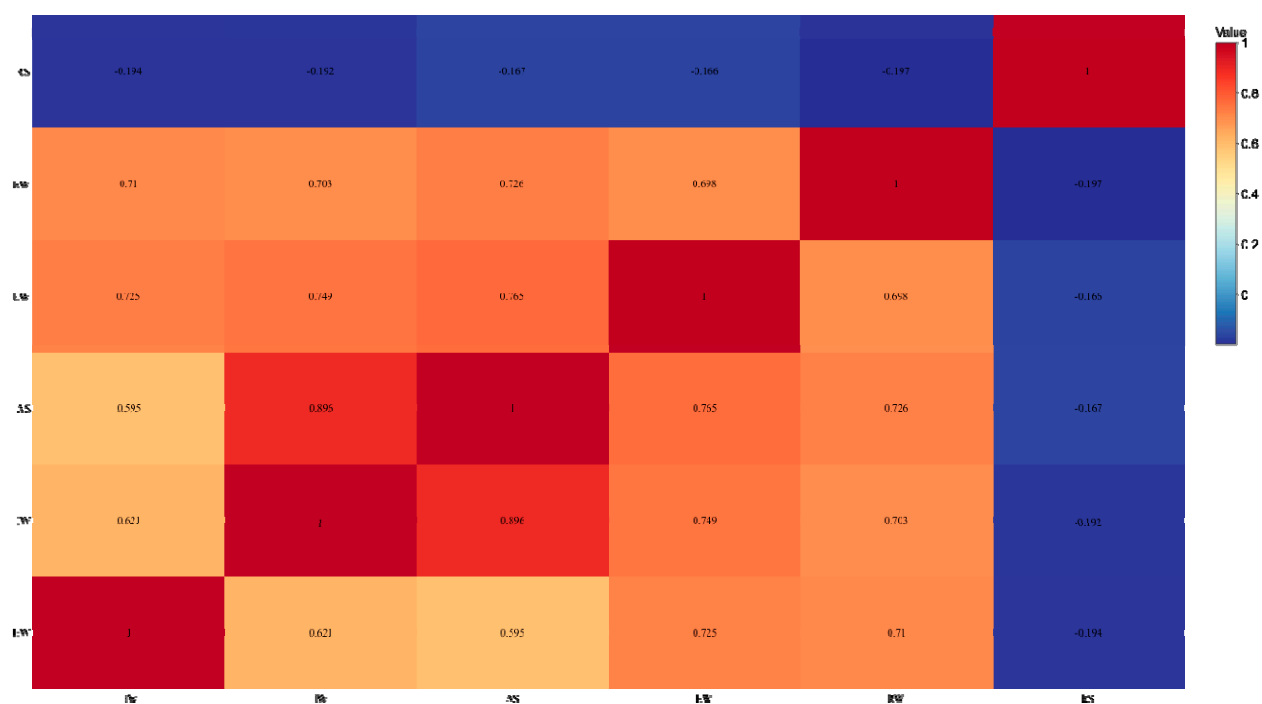

**Figure 2.** Spearman correlation heat map with correlation coefficient among assessed matrixes.
